# Supplementary material
Source: PubMed Central journal article supplement (PMC4304969)
Supplement: NIHMS645055-supplement-Supplemental_Digital_Content.pdf [file NIHMS645055-supplement-Supplemental_Digital_Content.pdf]

**Appendix 1. Characteristics of the Cohort of Live-Born Singleton Pregnancies During the Study Period Compared With the Subset of These Pregnancies With Available Aneuploidy Screening Blood Sample, Magee-Womens Hospital, Pittsburgh, Pennsylvania**

|                                                 | Singleton Deliveries of<br>Live-Born Infants,<br>n=65,867 | Singleton Deliveries of<br>Live-Born Infants<br>With Available<br>Aneuploidy Screening<br>Blood Sample,<br>n=12,861 |
|-------------------------------------------------|-----------------------------------------------------------|---------------------------------------------------------------------------------------------------------------------|
| Maternal age, years                             |                                                           |                                                                                                                     |
| <20                                             | 7.2                                                       | 7.1                                                                                                                 |
| 20-29                                           | 44.3                                                      | 41.3                                                                                                                |
| ≥30                                             | 49.5                                                      | 51.6                                                                                                                |
| Marital status                                  |                                                           |                                                                                                                     |
| Unmarried                                       | 37.7                                                      | 37.3                                                                                                                |
| Married                                         | 62.3                                                      | 62.7                                                                                                                |
| Maternal education                              |                                                           |                                                                                                                     |
| Less than high school                           | 8.2                                                       | 7.6                                                                                                                 |
| High school or equivalent                       | 23.3                                                      | 22.0                                                                                                                |
| Some college                                    | 23.1                                                      | 21.3                                                                                                                |
| College graduate                                | 45.4                                                      | 49.1                                                                                                                |
| Maternal race/ethnicity                         |                                                           |                                                                                                                     |
| White                                           | 77.1                                                      | 72.8                                                                                                                |
| Black                                           | 18.8                                                      | 21.2                                                                                                                |
| Puerto Rican                                    | 4.1                                                       | 6.0                                                                                                                 |
| Parity                                          |                                                           |                                                                                                                     |
| 0                                               | 44.8                                                      | 48.2                                                                                                                |
| 1 or more                                       | 55.2                                                      | 51.8                                                                                                                |
| Prepregnancy body mass index, kg/m <sup>2</sup> |                                                           |                                                                                                                     |
| <18.5                                           | 4.4                                                       | 4.2                                                                                                                 |
| 18.5-24.9                                       | 55.6                                                      | 56.5                                                                                                                |
| 25.0-29.9                                       | 22.2                                                      | 22.1                                                                                                                |
| ≥30.0                                           | 17.8                                                      | 17.2                                                                                                                |
| Smoking status                                  |                                                           |                                                                                                                     |
| Nonsmoker                                       | 86.6                                                      | 88.1                                                                                                                |
| Smoker                                          | 13.4                                                      | 11.9                                                                                                                |
| Type of provider                                |                                                           |                                                                                                                     |
| Magee-affiliated private practice               | 84.0                                                      | 76.9                                                                                                                |
| Magee outpatient resident clinic                | 16.0                                                      | 23.1                                                                                                                |
| Preterm birth                                   | 10.8                                                      | 8.9                                                                                                                 |

**Appendix 2. Association Between Maternal 25-Hydroxyvitamin D Concentrations at or Before 20 Weeks of Gestation and Preterm Birth in the Sample With Complete Data (n=1820)**

| Maternal serum 25(OH)D, nmol/L                        | Cases (n) | Incidence per 100 births <sup>a</sup> | Unadjusted relative risk (95% CI) | Adjusted <sup>b</sup> relative risk (95% CI) |
|-------------------------------------------------------|-----------|---------------------------------------|-----------------------------------|----------------------------------------------|
| <i>Preterm birth &lt;37 weeks</i>                     |           |                                       |                                   |                                              |
| <50                                                   | 170       | 10.8                                  | <b>1.6 (1.3, 2.1)</b>             | <b>2.0 (1.3, 3.0)</b>                        |
| 50–74.9                                               | 215       | 8.2                                   | 1.2 (0.9, 1.5)                    | 1.3 (0.9, 1.8)                               |
| ≥75                                                   | 192       | 6.9*                                  | referent                          | referent                                     |
| <i>Spontaneous preterm birth &lt;37 weeks</i>         |           |                                       |                                   |                                              |
| <50                                                   | 95        | 6.3                                   | <b>1.6 (1.1, 2.1)</b>             | <b>2.0 (1.2, 3.3)</b>                        |
| 50–74.9                                               | 110       | 4.3                                   | 1.0 (0.8, 1.4)                    | 1.1 (0.7, 1.6)                               |
| ≥75                                                   | 112       | 4.2*                                  | referent                          | referent                                     |
| <i>Medically indicated preterm birth &lt;37 weeks</i> |           |                                       |                                   |                                              |
| <50                                                   | 75        | 5.1                                   | <b>1.7 (1.2, 2.4)</b>             | <b>2.0 (1.2, 3.3)</b>                        |
| 50–74.9                                               | 105       | 4.2                                   | <b>1.4 (1.1, 1.9)</b>             | <b>1.5 (1.1, 2.3)</b>                        |
| ≥75                                                   | 80        | 3.0*                                  | referent                          | referent                                     |
| <i>Preterm birth &lt;34 weeks</i>                     |           |                                       |                                   |                                              |
| <50                                                   | 42        | 2.8                                   | <b>1.8 (1.2, 2.9)</b>             | 1.9 (1.0, 3.6)                               |
| 50–74.9                                               | 57        | 2.3                                   | 1.4 (1.0, 2.2)                    | 1.6 (0.9, 2.8)                               |
| ≥75                                                   | 42        | 1.6*                                  | referent                          | referent                                     |

Formatted: Font: Not Bold

Formatted: Font: Not Bold

Risk ratios and 95% CI that reach statistical significance at  $p < 0.05$  are presented in boldface.

25(OH)D, 25-hydroxyvitamin D; CI, confidence interval

<sup>a</sup> Incidence is based on the weighted sample.

<sup>b</sup> Adjusted for maternal race and ethnicity, prepregnancy body mass index, parity, maternal education, marital status, smoking status, season and gestational age of blood sampling, assay batch, and year of delivery.

\* $P < 0.05$  based on a test for trend adjusted for the case-cohort design.

**Appendix 3. Association between maternal 25-hydroxyvitamin D and the adjusted risk of preterm birth <37 weeks of gestation in the sample with complete data (n=1,820).**

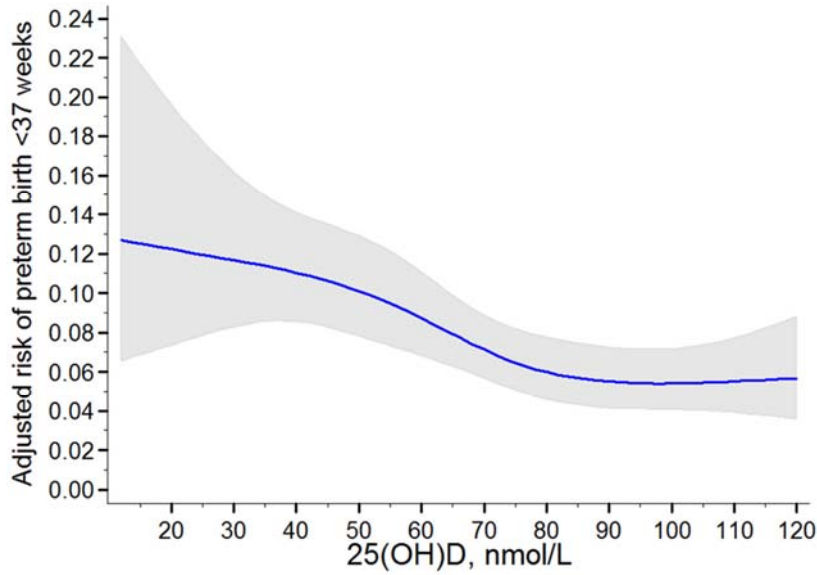

The *solid line* represents the point estimate and the *gray area* represents its 95% confidence interval. 25-hydroxyvitamin D was modeled as a restricted cubic spline with 4 knots (test of nonlinearity,  $P < .01$ ). The estimates were adjusted for maternal race and ethnicity, prepregnancy body mass index, parity, maternal education, marital status, smoking status, season and gestational age of blood sampling, assay batch, and year of delivery. All covariates were set to the mean value for graphing.

**Appendix 4. Association between maternal 25-hydroxyvitamin D and the adjusted risk of preterm birth <34 weeks of gestation in the sample with complete data (n=1,820).**

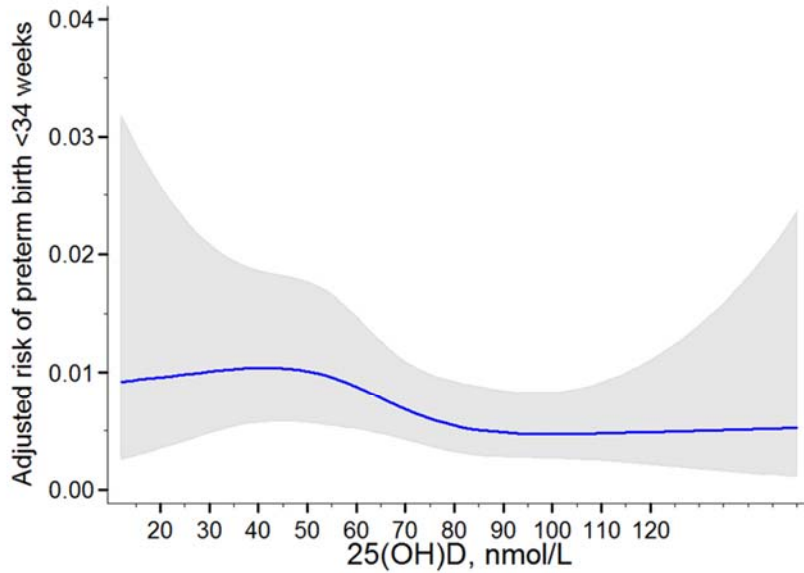

The *solid line* represents the point estimate and the *gray area* represents its 95% confidence interval. 25-hydroxyvitamin D was modeled as a restricted cubic spline with 4 knots (test of nonlinearity,  $P < .01$ ). The estimates were adjusted for maternal race and ethnicity, prepregnancy body mass index, parity, maternal education, marital status, smoking status, season and gestational age of blood sampling, assay batch, and year of delivery. All covariates were set to the mean value for graphing.
